# Supplementary material for: The Modulation of Mimicry by Ethnic Group-Membership and Emotional Expressions
Source: PLOS journal article supplement (doi:10.1371/journal.pone.0161064), 2016-08-24
Supplement: S2 (10.1371/journal.pone.0161064.s002) [file journal.pone.0161064.s002]

## **S2 File**

### **Additional results experiment 2**

#### **Response inhibition and baseline trials (SAMT)**

We performed repeated measures ANOVAs separate on incongruent and baseline trials EMOTION (Happy, Angry), GROUP (In-, Out-Group). For incongruent trials, the measure of response inhibition, results revealed no significant main effect for the factor Group ( $F(1,60) = 1.195$ ,  $p = .279$ , partial  $\eta^2 = .02$ ), Emotion ( $F(1,60) = 1.103$ ,  $p = .298$ , partial  $\eta^2 = .018$ ) or the interaction effect Group x Emotion ( $F(1,60) = 1.586$ ,  $p = .213$ , partial  $\eta^2 = .026$ ). For baseline trials, this revealed no significant main effect for the factor Group ( $F(1,60) = .735$ ,  $p = .395$ , partial  $\eta^2 = .012$ ), Emotion ( $F(1,60) = .104$ ,  $p = .748$ , partial  $\eta^2 = .002$ ) or the interaction effect Group x Emotion ( $F(1,60) = .006$ ,  $p = .937$ , partial  $\eta^2 < .001$ ).
